# Supplementary material for: Polypeptide Composition and Topology Affect Hydrogelation of Star-Shaped Poly(L-lysine)-Based Amphiphilic Copolypeptides
Source: MDPI journal article supplement (doi:10.3390/gels7030131), 2021-08-30
Supplement: s1 [file s1]

## Article

# Polypeptide Composition and Topology Affect Hydrogelation of Star-Shaped Poly(L-lysine)-Based Amphiphilic Copolypeptides

Thi Ha My Phan <sup>1</sup>, Ching-Chia Huang <sup>1</sup>, Yi-Jen Tsai <sup>1</sup>, Jin-Jia Hu <sup>3,\*</sup>, and Jeng-Shiung Jan <sup>1,2,\*</sup>

<sup>1</sup> Department of Chemical Engineering, National Cheng Kung University, Tainan 70101, Taiwan; myphan3008@gmail.com (T.H.M.P.); s110076@shsh.tw (C.-C.H.); iris870814@gmail.com (Y.-J.T.)

<sup>2</sup> Hierarchical Green-Energy Materials (Hi-GEM) Research Center, National Cheng Kung University, Tainan 70101, Taiwan

<sup>3</sup> Department of Mechanical Engineering, National Yang Ming Chiao Tung University, Hsinchu 30010, Taiwan

\* Correspondence: jsjan@mail.ncku.edu.tw (J.-J.H.); jjhu@nctu.edu.tw (J.-S.J.)

## Supplementary Materials

**Table S1.** Feed molar ratio, degree of polymerization (DP), number-average molecular weight ( $M_n$ ) and molecular weight distribution ( $M_w/M_n$ ) of s-PZLL homopolypeptides.

| Polypeptide           | Feed ratio | DP of ZLL | $M_n^b$ | $M_w/M_n^b$ |
|-----------------------|------------|-----------|---------|-------------|
| 3s-PZLL <sub>22</sub> | 1:60       | 66        | 17000   | 1.37        |
| 6s-PZLL <sub>21</sub> | 1:120      | 126       | 35200   | 1.42        |

<sup>a</sup> Degree of polymerization (DP) of ZLL was calculated by <sup>1</sup>H NMR. <sup>b</sup>  $M_n$  and  $M_w/M_n$  were determined by GPC-LS.

**Table S2.** Feed ratios and block ratios between the ZLL block and the second block.

| Polypeptide                                  | Feed ratio | ZLL: Y <sup>a</sup> |
|----------------------------------------------|------------|---------------------|
| 3s-PZLL <sub>22</sub> -b-PPhe <sub>6.3</sub> | 4 : 1      | 3.5 : 1             |
| 6s-PZLL <sub>21</sub> -b-PPhe <sub>5.3</sub> | 4 : 1      | 4.0 : 1             |
| 3s-PZLL <sub>22</sub> -b-PLeu <sub>5.5</sub> | 4 : 1      | 4.0 : 1             |
| 6s-PZLL <sub>21</sub> -b-PLeu <sub>4.4</sub> | 4 : 1      | 4.8 : 1             |
| 3s-PZLL <sub>22</sub> -b-PVal <sub>5.1</sub> | 4 : 1      | 4.3 : 1             |
| 6s-PZLL <sub>21</sub> -b-PVal <sub>5</sub>   | 4 : 1      | 4.2 : 1             |

<sup>a</sup> Block ratio of the ZLL block to the second block (Y block) was calculated by <sup>1</sup>H NMR.

**Table S3.** The corresponding d spacing obtained from SAXS profiles of 3-armed PLL-*b*-PY hydrogel samples.

| Samples                                              | Concentration (wt%) | d (Å) |
|------------------------------------------------------|---------------------|-------|
| 3s-PLL <sub>22</sub> - <i>b</i> -PPhe <sub>6.3</sub> | 5.0                 | 273   |
|                                                      | 7.0                 | 273   |
| 3s-PLL <sub>22</sub> - <i>b</i> -PLeu <sub>5.5</sub> | 8.0                 | 241.5 |
|                                                      | 9.0                 | 241.5 |
| 3s-PLL <sub>22</sub> - <i>b</i> -PVal <sub>5.1</sub> | 6.0                 | 314   |
|                                                      | 8.0                 | 314   |

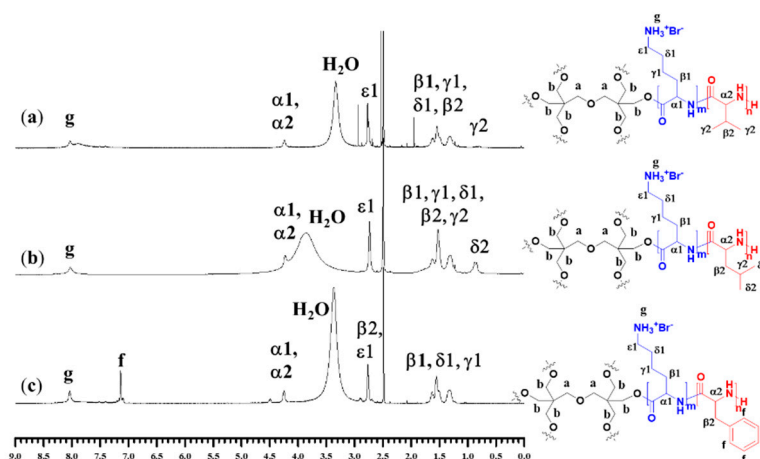**Figure S1.** <sup>1</sup>H-NMR spectra of (a) 6s-PLL<sub>21</sub>-*b*-PVal<sub>5</sub> in DMSO-*d*<sub>6</sub>, (b) 6s-PLL<sub>21</sub>-*b*-PLeu<sub>4.4</sub> in DMSO-*d*<sub>6</sub>, and (c) 6s-PLL<sub>21</sub>-*b*-PPhe<sub>5.3</sub> in DMSO-*d*<sub>6</sub>.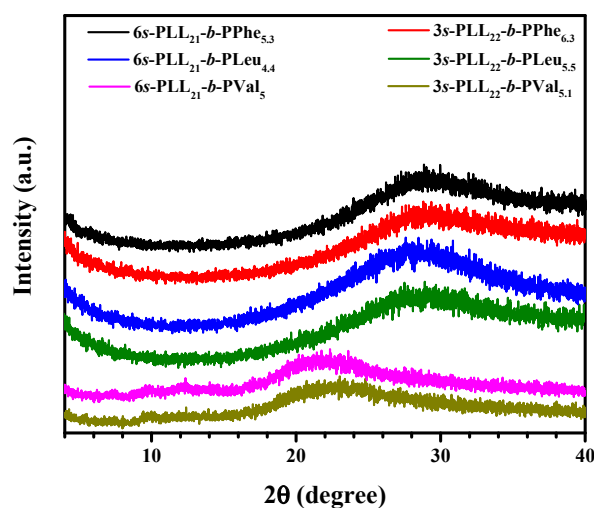**Figure S2.** XRD patterns of freeze-dried 6s-PLL<sub>21</sub>-*b*-PPhe<sub>5.3</sub> (5.0 wt%), 3s-PLL<sub>22</sub>-*b*-PPhe<sub>6.3</sub> (5.0 wt%), 6s-PLL<sub>21</sub>-*b*-PLeu<sub>4.4</sub> (5.0 wt%), 3s-PLL<sub>22</sub>-*b*-PLeu<sub>5.5</sub> (8.0 wt%), 6s-PLL<sub>21</sub>-*b*-PVal<sub>5</sub> (5.0 wt%), and 3s-PLL<sub>22</sub>-*b*-PVal<sub>5.1</sub> (8.0 wt%) hydrogel samples.

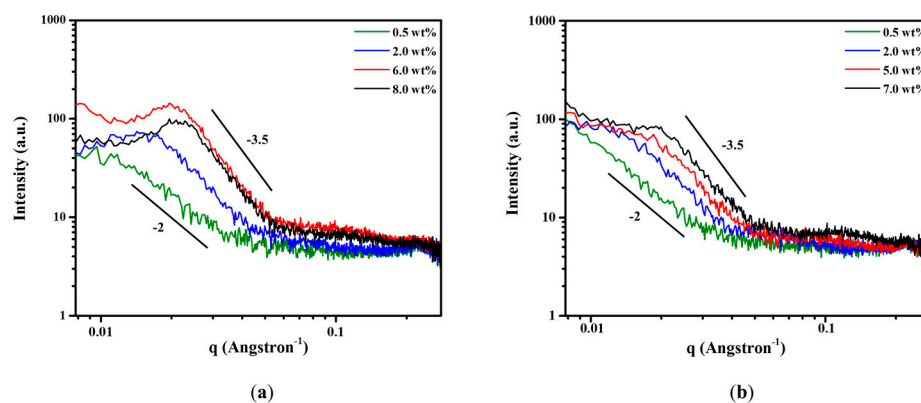

**Figure S3.** SAXS profiles of (a) 3S-PLL<sub>22</sub>-b-PVal<sub>51</sub> and (b) 6S-PLL<sub>21</sub>-b-PVal<sub>5</sub> sol and gel solutions at different polypeptide concentrations in DI water.
